# Supplementary material for: High-power piezoelectric behavior of acceptor-doped 〈001〉 and 〈111〉 textured piezoelectric ceramics
Source: Royal Society of Chemistry journal article supplement (doi:10.1039/d2tc03786f), 2022-11-29
Supplement: d2tc03786f1.pdf [file d2tc03786f1.pdf]

## Supporting Information

### **High-power Piezoelectric Behavior of Acceptor-doped <001> and <111> Textured Piezoelectric Ceramics**

Haoyang Leng<sup>a</sup>, Yongke Yan<sup>a</sup>, Xiaotian Li<sup>a</sup>, Sumanta Kumar Karan<sup>a</sup>, Mark Fanton<sup>b</sup> and  
Shashank Priya<sup>a,\*</sup>

<sup>a</sup>Department of Materials Science and Engineering, and Materials Research Institute

The Pennsylvania State University, University Park, Pennsylvania 16802, United States

<sup>b</sup>Applied Research Laboratory, The Pennsylvania State University, University Park, PA, 16801,  
USA

\*Corresponding authors: Shashank Priya, E-mail address: sup103@psu.edu

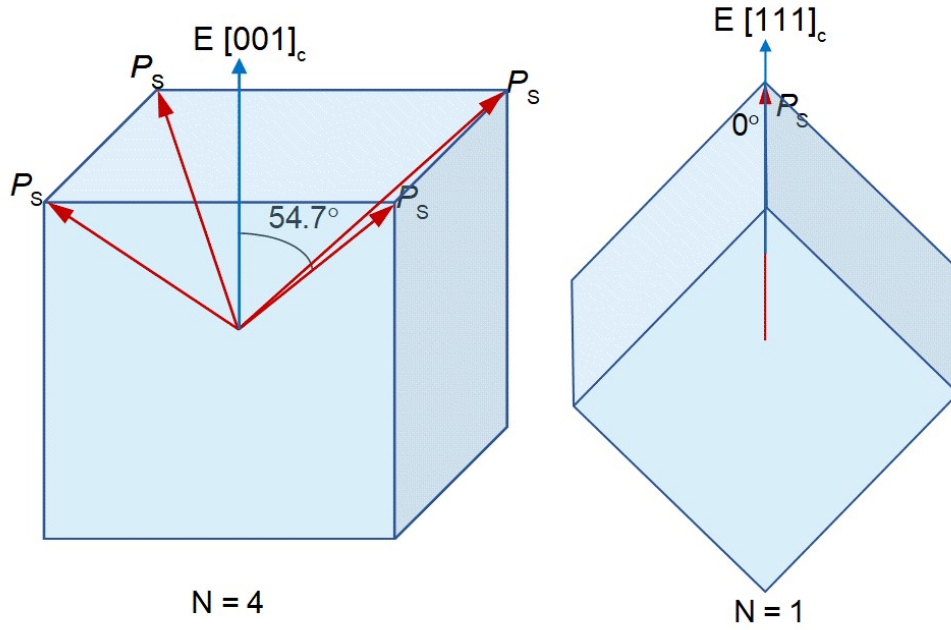

**Figure S1.** Engineered domain configurations for  $[001]_c$ - and  $[111]_c$ -oriented rhombohedral crystals.

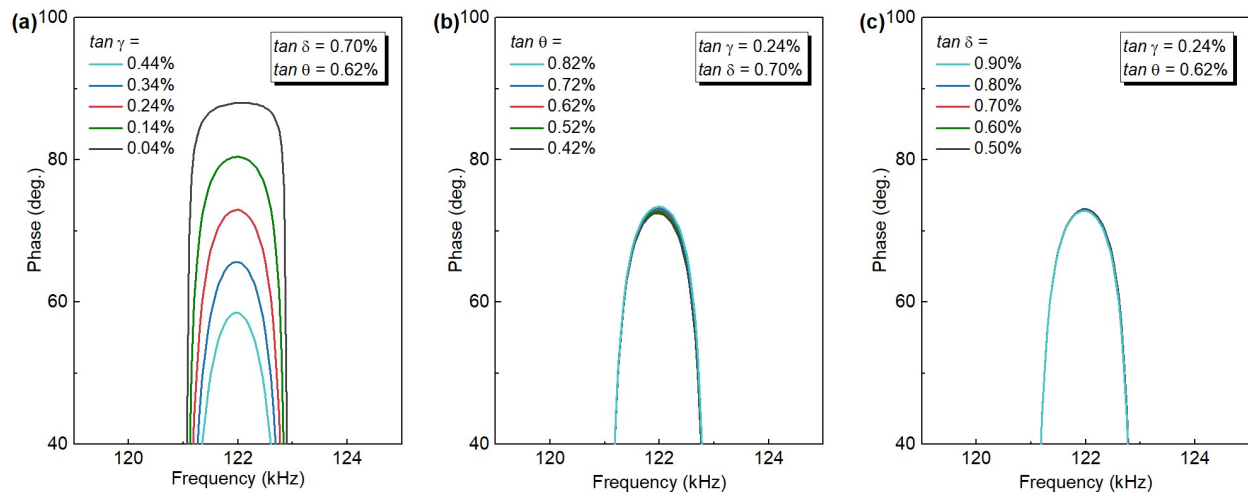

**Figure S2.** (a)–(c) Simulated phase angle spectra for  $\langle 111 \rangle$  textured ceramic with different loss factors.

**Table S1.** Densities for random, <001> and <111> textured piezoelectric ceramics.

| Specimen                | Template            | Theoretical density<br>[g cm <sup>-3</sup> ] | Measured density<br>[g cm <sup>-3</sup> ] | Relative density<br>[%] |
|-------------------------|---------------------|----------------------------------------------|-------------------------------------------|-------------------------|
| Random                  | 0                   | 8.19                                         | 7.92                                      | 96.7                    |
| <001> Textured          | 2 vol.%<br><001> BT | 8.15                                         | 7.82                                      | 96.0                    |
| <111> Textured          | 2 vol.%<br><111> BT | 8.15                                         | 7.67                                      | 94.1                    |
| Doped-<001><br>Textured | 2 vol.%<br><001> BT | 8.15                                         | 7.78                                      | 95.5                    |
| Doped-<111><br>Textured | 2 vol.%<br><111> BT | 8.15                                         | 7.69                                      | 94.4                    |
